# Supplementary material for: The Perception and Attitudes toward COVID-19 Vaccines: A Cross-Sectional Study in Poland
Source: Vaccines (Basel). 2021 Apr 14;9(4):382. doi: 10.3390/vaccines9040382 (PMC8069794; doi:10.3390/vaccines9040382)
Supplement: Supplementary file 1 [file vaccines-09-00382-s001.pdf]

## TRANSLATED QUESTIONNAIRE

1. Have you been vaccinated against COVID-19? Yes No
2. Do you wish to receive the vaccine against COVID-19? Yes No
3. Please evaluate your level of trust in the vaccines in relation to their type using a 1-10 scale, where 0 – I have not heard about this vaccine type, 1 – no trust, 5- medium level of trust, 10 – high level of trust.

[illegible]

4. Please evaluate your level of fear related to COVID-19 vaccination using a 1-10 scale, where 1 – no fear, 5 – medium level of fear, 10 – a very high level of fear.

1      2      3      4      5      6      7      8      9      10

5. **What are your primary reasons behind a fear related to COVID-19 vaccination?** *(multiple answer question)*

I have no fears

The onset of serious allergic reaction following the vaccine administration (e.g., anaphylaxis)

The onset of other severe adverse effects following the vaccine administration

### Potential unknown long-term adverse effects of the vaccine

### Potential adverse effect on fertility

### Potential induction of autoimmune reactions following the vaccine administration

Other, please specify:...

6. Please evaluate your level of trust in the COVID-19 vaccines authorized for use in Poland using a 1-10 scale, where 1 – no trust, 5- medium level of trust, 10 – high level of trust.

[illegible]

7. Please evaluate your level of trust in the COVID-19 vaccines not authorized for use in Poland using a 1-10 scale, where 0 – I have not heard about this vaccine type, 1 – no trust, 5- medium level of trust, 10 – high level of trust.

[illegible]

8. **What are your primary reasons behind the willingness to receive a COVID-19 vaccine?**  
*(multiple answer question)*  
 Protecting myself from infection  
 Protecting relatives from infection  
 Putting an end to the pandemic  
 Other, please specify:...
9. **Are you a COVID-19 convalescent individual?** Yes No
10. **Did you experience the death of your relative due to COVID-19?** Yes No
11. **What are your primary sources of information on COVID-19 vaccines?**  
*(multiple answer question)*  
 I do not seek information on COVID-19 vaccines  
 TV  
 Radio  
 Press  
 Expert materials  
 Scientific literature  
 Information from relatives/friends
12. **Your age** (in years):...
13. **Your place of living:**  
 Rural  
 Urban  $\geq 250,000$  residents  
 Urban 50,000–200,000 residents  
 Urban 50,000–100,000 residents  
 Urban < 50,000 residents
14. **Your gender:** Female Male
15. **Your education level:**  
 Primary  
 Secondary  
 Vocational  
 Tertiary
16. **If tertiary, what is your field of discipline?** (For assistance, see the Polish classification of scientific fields; [https://pl.wikipedia.org/wiki/Klasyfikacja\\_dziedzin\\_i\\_dyscyplin\\_naukowych\\_w\\_Polsce](https://pl.wikipedia.org/wiki/Klasyfikacja_dziedzin_i_dyscyplin_naukowych_w_Polsce))  
 Medicine and health  
 Exact and natural science  
 Agricultural  
 Technology  
 humanities  
 Social  
 Theology  
 Art
